# Supplementary material for: T2-weighted magnetic resonance imaging characterization of prolactinomas and association with their response to dopamine agonists
Source: Springer Nature journal article supplement (doi:10.1007/s12020-018-1765-3), 2018-09-28
Supplement: MOESM2 [file 16160480]

**Online resource 2.** Uni- and multivariate analyses of factors predicting a poor response to dopamine agonists, arbitrarily defined as both the lack of normalization of prolactin concentrations and the lack of a more than 50%-reduction of the largest tumor coronal surface after one year of medical treatment with dopamine agonists.

|  | **Univariate analysis** | | | **Multivariate analysis** | | |
| --- | --- | --- | --- | --- | --- | --- |
| Variable | Odds ratio | 95% CI | *P value* | Odds ratio | 95% CI | *P value* |
| Male gender | **2.771** | [0.993-8.231] | **0.067** | - | - | 0.380 |
| Tumor height (mm) | **1.059** | [0.997-1.167] | **0.064** | - | - | 0.434 |
| Invasive tumor | 2.436 | [0.584-6.993] | 0.291 | N/I | N/I | N/I |
| T2 hyperintense tumor | 1.800 | [0.552-5.868] | 0.330 | N/I | N/I | N/I |
| T2 heterogeneous tumor | **2.727** | [0.956-7.778] | **0.061** | - | - | 0.291 |

*CI: confidence interval; NS: not significant; N/I: not included in the multivariate analysis*
